# Supplementary material for: Two 3d–4f double helical chains including [Dy2M2]n (M = NiII and CoII) cores exhibiting slow magnetic relaxation
Source: Royal Society of Chemistry journal article supplement (doi:10.1039/c6dt00951d), 2016-01-01
Supplement: c6dt00951d1.pdf [file c6dt00951d1.pdf]

## Supporting Information

### Two 3d-4f double helical chains including $[\text{Dy}_2\text{M}_2]_n$ ( $\text{M} = \text{Ni}^{\text{II}}$ and $\text{Co}^{\text{II}}$ ) cores exhibiting slow magnetic relaxation

Shixiong She,<sup>a</sup> Yahong Li<sup>\*a</sup> and Wu Li<sup>b</sup>

<sup>a</sup>Key Laboratory of Organic Synthesis of Jiangsu Province, College of Chemistry, Chemical Engineering and materials Science, Soochow University, Soochow University, Suzhou, People's Republic of China

<sup>b</sup>Key Laboratory of Salt Lake Resources and Chemistry, Qinghai Institute of Salt Lakes, Chinese Academy of Sciences, Qinghai, 810008, People's Republic of China

|                                                                     |    |
|---------------------------------------------------------------------|----|
| 1. Selected bond lengths and angles for <b>1</b> and <b>2</b> ..... | 2  |
| 2. Coordination modes in complex <b>1</b> .....                     | 12 |
| 3. DTG-DSC curves for complexes <b>1</b> and <b>2</b> .....         | 13 |
| 4. Magnetic properties for complexes <b>1</b> and <b>2</b> .....    | 14 |
| 5. XRD patterns of <b>1</b> and <b>2</b> .....                      | 17 |
| 6. IR spectra of <b>1</b> and <b>2</b> .....                        | 18 |

## 1. Selected bond lengths and angles for 1 and 2

Table S1 Selected bond distances (Å) for complex 1

| Atom | Atom             | Length/Å   | Atom | Atom             | Length/Å |
|------|------------------|------------|------|------------------|----------|
| Dy1  | O6               | 2.297(4)   | Dy4  | O5W              | 2.360(4) |
| Dy1  | O16 <sup>1</sup> | 2.343(5)   | Dy4  | O26              | 2.384(5) |
| Dy1  | O12              | 2.357(5)   | Dy4  | O20 <sup>4</sup> | 2.451(5) |
| Dy1  | O2               | 2.357(4)   | Dy4  | O29              | 2.524(5) |
| Dy1  | O1W              | 2.435(4)   | Dy4  | O25              | 2.573(5) |
| Dy1  | O34              | 2.446(6)   | N1   | Ni1              | 2.042(5) |
| Dy1  | O33              | 2.474(6)   | N2   | Ni1              | 2.034(6) |
| Dy1  | O1               | 2.549(5)   | N3   | Ni2              | 2.032(6) |
| Dy1  | O5               | 2.626(5)   | N4   | Ni2              | 2.034(6) |
| Dy1  | N9               | 2.898(7)   | N5   | Ni3              | 2.002(6) |
| Dy2  | O8               | 2.292(4)   | N6   | Ni3              | 2.037(6) |
| Dy2  | O14              | 2.296(5)   | N7   | Ni4              | 2.043(6) |
| Dy2  | O3W              | 2.356(5)   | N8   | Ni4              | 2.044(6) |
| Dy2  | O2W              | 2.369(5)   | Ni1  | O6               | 2.016(5) |
| Dy2  | O10              | 2.390(4)   | Ni1  | O2               | 2.024(4) |
| Dy2  | O4 <sup>2</sup>  | 2.424(5)   | Ni1  | O3               | 2.082(4) |
| Dy2  | O9               | 2.534(5)   | Ni1  | O7               | 2.097(4) |
| Dy2  | O13              | 2.574(5)   | Ni2  | O14              | 2.024(5) |
| Dy2  | Ni2              | 3.4986(9)  | Ni2  | O10              | 2.038(5) |
| Dy3  | O32 <sup>3</sup> | 2.285(5)   | Ni2  | O11              | 2.091(5) |
| Dy3  | O22              | 2.297(5)   | Ni2  | O15              | 2.097(5) |
| Dy3  | O28              | 2.352(5)   | Ni3  | O22              | 2.021(5) |
| Dy3  | O18              | 2.353(5)   | Ni3  | O18              | 2.042(4) |
| Dy3  | O4W              | 2.380(5)   | Ni3  | O19              | 2.078(5) |
| Dy3  | O37              | 2.394(7)   | Ni3  | O23              | 2.120(5) |
| Dy3  | O38              | 2.466(7)   | Ni4  | O30              | 2.008(5) |
| Dy3  | O17              | 2.571(5)   | Ni4  | O26              | 2.050(5) |
| Dy3  | O21              | 2.656(5)   | Ni4  | O27              | 2.063(4) |
| Dy3  | N10              | 2.807(9)   | Ni4  | O31              | 2.086(5) |
| Dy3  | Ni3              | 3.4978(10) | O4   | Dy2 <sup>1</sup> | 2.424(5) |
| Dy4  | O42              | 2.235(5)   | O16  | Dy1 <sup>2</sup> | 2.343(5) |
| Dy4  | O30              | 2.297(5)   | O20  | Dy4 <sup>3</sup> | 2.451(5) |
| Dy4  | O24              | 2.303(4)   | O32  | Dy3 <sup>4</sup> | 2.285(5) |

<sup>1</sup>1-Y,-1/2+X,1/4+Z; <sup>2</sup>1/2+Y,1-X,-1/4+Z; <sup>3</sup>+Y,1/2-X,1/4+Z; <sup>4</sup>1/2-Y,+X,-1/4+Z

**Table S2** Selected bond angles (°) for complex **1**

| Atom             | Atom | Atom             | Angle/°    | Atom             | Atom | Atom             | Angle/°    |
|------------------|------|------------------|------------|------------------|------|------------------|------------|
| O6               | Dy1  | O16 <sup>1</sup> | 104.76(17) | O37              | Dy3  | N10              | 26.0(3)    |
| O6               | Dy1  | O12              | 76.91(17)  | O38              | Dy3  | N10              | 29.3(3)    |
| O16 <sup>1</sup> | Dy1  | O12              | 139.60(18) | O17              | Dy3  | N10              | 88.2(2)    |
| O6               | Dy1  | O2               | 66.29(15)  | O21              | Dy3  | N10              | 90.6(2)    |
| O16 <sup>1</sup> | Dy1  | O2               | 82.07(17)  | O32 <sup>3</sup> | Dy3  | Ni3              | 96.75(14)  |
| O12              | Dy1  | O2               | 131.32(16) | O22              | Dy3  | Ni3              | 33.32(12)  |
| O6               | Dy1  | O1W              | 85.77(16)  | O28              | Dy3  | Ni3              | 105.56(12) |
| O16 <sup>1</sup> | Dy1  | O1W              | 146.09(17) | O18              | Dy3  | Ni3              | 34.28(11)  |
| O12              | Dy1  | O1W              | 73.86(17)  | O4W              | Dy3  | Ni3              | 72.27(13)  |
| O2               | Dy1  | O1W              | 72.75(15)  | O37              | Dy3  | Ni3              | 161.02(19) |
| O6               | Dy1  | O34              | 129.79(19) | O38              | Dy3  | Ni3              | 144.3(2)   |
| O16 <sup>1</sup> | Dy1  | O34              | 73.5(2)    | O17              | Dy3  | Ni3              | 96.21(11)  |
| O12              | Dy1  | O34              | 75.26(19)  | O21              | Dy3  | Ni3              | 90.13(11)  |
| O2               | Dy1  | O34              | 153.40(17) | N10              | Dy3  | Ni3              | 169.1(2)   |
| O1W              | Dy1  | O34              | 124.15(19) | O42              | Dy4  | O30              | 150.88(18) |
| O6               | Dy1  | O33              | 145.5(2)   | O42              | Dy4  | O24              | 87.09(19)  |
| O16 <sup>1</sup> | Dy1  | O33              | 107.2(2)   | O30              | Dy4  | O24              | 97.21(17)  |
| O12              | Dy1  | O33              | 70.4(2)    | O42              | Dy4  | O5W              | 101.59(19) |
| O2               | Dy1  | O33              | 130.91(18) | O30              | Dy4  | O5W              | 91.40(17)  |
| O1W              | Dy1  | O33              | 74.99(19)  | O24              | Dy4  | O5W              | 144.79(17) |
| O34              | Dy1  | O33              | 51.1(2)    | O42              | Dy4  | O26              | 142.60(18) |
| O6               | Dy1  | O1               | 129.91(15) | O30              | Dy4  | O26              | 66.09(16)  |
| O16 <sup>1</sup> | Dy1  | O1               | 75.81(17)  | O24              | Dy4  | O26              | 79.27(16)  |
| O12              | Dy1  | O1               | 134.44(17) | O5W              | Dy4  | O26              | 73.22(16)  |
| O2               | Dy1  | O1               | 64.23(14)  | O42              | Dy4  | O20 <sup>4</sup> | 74.57(19)  |
| O1W              | Dy1  | O1               | 72.96(15)  | O30              | Dy4  | O20 <sup>4</sup> | 84.71(17)  |
| O34              | Dy1  | O1               | 99.02(19)  | O24              | Dy4  | O20 <sup>4</sup> | 141.52(16) |

---

|                  |     |                 |            |                  |     |                  |            |
|------------------|-----|-----------------|------------|------------------|-----|------------------|------------|
| O33              | Dy1 | O1              | 71.53(18)  | O5W              | Dy4 | O20 <sup>4</sup> | 73.11(16)  |
| O6               | Dy1 | O5              | 62.28(16)  | O26              | Dy4 | O20 <sup>4</sup> | 134.22(16) |
| O16 <sup>1</sup> | Dy1 | O5              | 75.68(17)  | O42              | Dy4 | O29              | 88.85(19)  |
| O12              | Dy1 | O5              | 69.64(17)  | O30              | Dy4 | O29              | 64.12(17)  |
| O2               | Dy1 | O5              | 115.10(15) | O24              | Dy4 | O29              | 78.53(16)  |
| O1W              | Dy1 | O5              | 135.62(16) | O5W              | Dy4 | O29              | 134.99(16) |
| O34              | Dy1 | O5              | 69.12(19)  | O26              | Dy4 | O29              | 121.55(16) |
| O33              | Dy1 | O5              | 113.88(19) | O20 <sup>4</sup> | Dy4 | O29              | 67.77(16)  |
| O1               | Dy1 | O5              | 151.24(15) | O42              | Dy4 | O25              | 79.66(18)  |
| O6               | Dy1 | N9              | 141.05(19) | O30              | Dy4 | O25              | 129.42(16) |
| O16 <sup>1</sup> | Dy1 | N9              | 92.44(19)  | O24              | Dy4 | O25              | 77.73(17)  |
| O12              | Dy1 | N9              | 67.74(19)  | O5W              | Dy4 | O25              | 70.57(17)  |
| O2               | Dy1 | N9              | 152.04(19) | O26              | Dy4 | O25              | 63.52(16)  |
| O1W              | Dy1 | N9              | 99.21(19)  | O20 <sup>4</sup> | Dy4 | O25              | 129.49(17) |
| O34              | Dy1 | N9              | 25.3(2)    | O29              | Dy4 | O25              | 154.06(16) |
| O33              | Dy1 | N9              | 26.2(2)    | O6               | Ni1 | O2               | 78.09(17)  |
| O1               | Dy1 | N9              | 87.83(19)  | O6               | Ni1 | N2               | 88.3(2)    |
| O5               | Dy1 | N9              | 89.6(2)    | O2               | Ni1 | N2               | 161.8(2)   |
| O8               | Dy2 | O14             | 97.37(17)  | O6               | Ni1 | N1               | 163.1(2)   |
| O8               | Dy2 | O3W             | 144.33(16) | O2               | Ni1 | N1               | 90.3(2)    |
| O14              | Dy2 | O3W             | 88.62(17)  | N2               | Ni1 | N1               | 105.4(2)   |
| O8               | Dy2 | O2W             | 77.28(16)  | O6               | Ni1 | O3               | 86.91(19)  |
| O14              | Dy2 | O2W             | 146.38(18) | O2               | Ni1 | O3               | 98.94(18)  |
| O3W              | Dy2 | O2W             | 115.23(18) | N2               | Ni1 | O3               | 92.3(2)    |
| O8               | Dy2 | O10             | 78.22(15)  | N1               | Ni1 | O3               | 82.7(2)    |
| O14              | Dy2 | O10             | 66.89(16)  | O6               | Ni1 | O7               | 100.18(19) |
| O3W              | Dy2 | O10             | 71.93(15)  | O2               | Ni1 | O7               | 87.27(18)  |
| O2W              | Dy2 | O10             | 140.89(17) | N2               | Ni1 | O7               | 83.3(2)    |
| O8               | Dy2 | O4 <sup>2</sup> | 140.16(16) | N1               | Ni1 | O7               | 91.4(2)    |

---

---

|                  |     |                 |            |     |     |     |            |
|------------------|-----|-----------------|------------|-----|-----|-----|------------|
| O14              | Dy2 | O4 <sup>2</sup> | 90.35(17)  | O3  | Ni1 | O7  | 171.46(18) |
| O3W              | Dy2 | O4 <sup>2</sup> | 74.49(16)  | O14 | Ni2 | N3  | 165.7(2)   |
| O2W              | Dy2 | O4 <sup>2</sup> | 75.00(17)  | O14 | Ni2 | N4  | 87.9(2)    |
| O10              | Dy2 | O4 <sup>2</sup> | 139.41(16) | N3  | Ni2 | N4  | 104.8(3)   |
| O8               | Dy2 | O9              | 80.41(17)  | O14 | Ni2 | O10 | 79.00(18)  |
| O14              | Dy2 | O9              | 130.27(16) | N3  | Ni2 | O10 | 89.7(2)    |
| O3W              | Dy2 | O9              | 69.30(16)  | N4  | Ni2 | O10 | 162.7(2)   |
| O2W              | Dy2 | O9              | 82.12(18)  | O14 | Ni2 | O11 | 91.30(19)  |
| O10              | Dy2 | O9              | 64.04(16)  | N3  | Ni2 | O11 | 82.5(2)    |
| O4 <sup>2</sup>  | Dy2 | O9              | 122.73(17) | N4  | Ni2 | O11 | 88.8(2)    |
| O8               | Dy2 | O13             | 75.90(16)  | O10 | Ni2 | O11 | 102.53(19) |
| O14              | Dy2 | O13             | 63.52(16)  | O14 | Ni2 | O15 | 96.51(18)  |
| O3W              | Dy2 | O13             | 136.31(16) | N3  | Ni2 | O15 | 91.5(2)    |
| O2W              | Dy2 | O13             | 83.13(18)  | N4  | Ni2 | O15 | 84.0(2)    |
| O10              | Dy2 | O13             | 119.41(16) | O10 | Ni2 | O15 | 86.40(19)  |
| O4 <sup>2</sup>  | Dy2 | O13             | 72.88(17)  | O11 | Ni2 | O15 | 169.15(19) |
| O9               | Dy2 | O13             | 154.33(16) | O14 | Ni2 | Dy2 | 38.62(13)  |
| O8               | Dy2 | Ni2             | 93.09(11)  | N3  | Ni2 | Dy2 | 131.18(19) |
| O14              | Dy2 | Ni2             | 33.38(11)  | N4  | Ni2 | Dy2 | 123.05(17) |
| O3W              | Dy2 | Ni2             | 72.99(12)  | O10 | Ni2 | Dy2 | 41.48(12)  |
| O2W              | Dy2 | Ni2             | 170.35(12) | O11 | Ni2 | Dy2 | 105.86(13) |
| O10              | Dy2 | Ni2             | 34.40(11)  | O15 | Ni2 | Dy2 | 84.90(13)  |
| O4 <sup>2</sup>  | Dy2 | Ni2             | 113.13(12) | N5  | Ni3 | O22 | 163.0(2)   |
| O9               | Dy2 | Ni2             | 96.89(12)  | N5  | Ni3 | N6  | 105.2(2)   |
| O13              | Dy2 | Ni2             | 94.16(12)  | O22 | Ni3 | N6  | 88.6(2)    |
| O32 <sup>3</sup> | Dy3 | O22             | 104.28(17) | N5  | Ni3 | O18 | 90.0(2)    |
| O32 <sup>3</sup> | Dy3 | O28             | 136.08(18) | O22 | Ni3 | O18 | 78.57(18)  |
| O22              | Dy3 | O28             | 78.25(16)  | N6  | Ni3 | O18 | 161.6(2)   |
| O32 <sup>3</sup> | Dy3 | O18             | 80.50(17)  | N5  | Ni3 | O19 | 82.8(2)    |

---

|                  |     |     |            |     |     |     |            |
|------------------|-----|-----|------------|-----|-----|-----|------------|
| O22              | Dy3 | O18 | 67.17(16)  | O22 | Ni3 | O19 | 86.24(18)  |
| O28              | Dy3 | O18 | 135.89(16) | N6  | Ni3 | O19 | 94.1(2)    |
| O32 <sup>3</sup> | Dy3 | O4W | 148.00(18) | O18 | Ni3 | O19 | 98.06(18)  |
| O22              | Dy3 | O4W | 83.18(17)  | N5  | Ni3 | O23 | 93.3(2)    |
| O28              | Dy3 | O4W | 75.71(17)  | O22 | Ni3 | O23 | 98.67(18)  |
| O18              | Dy3 | O4W | 73.83(16)  | N6  | Ni3 | O23 | 82.0(2)    |
| O32 <sup>3</sup> | Dy3 | O37 | 71.5(2)    | O18 | Ni3 | O23 | 86.95(18)  |
| O22              | Dy3 | O37 | 133.6(2)   | O19 | Ni3 | O23 | 173.62(19) |
| O28              | Dy3 | O37 | 75.8(2)    | N5  | Ni3 | Dy3 | 130.33(17) |
| O18              | Dy3 | O37 | 148.3(2)   | O22 | Ni3 | Dy3 | 38.63(13)  |
| O4W              | Dy3 | O37 | 125.5(2)   | N6  | Ni3 | Dy3 | 124.20(17) |
| O32 <sup>3</sup> | Dy3 | O38 | 111.4(2)   | O18 | Ni3 | Dy3 | 40.47(13)  |
| O22              | Dy3 | O38 | 142.7(2)   | O19 | Ni3 | Dy3 | 97.54(14)  |
| O28              | Dy3 | O38 | 68.9(2)    | O23 | Ni3 | Dy3 | 88.83(13)  |
| O18              | Dy3 | O38 | 128.2(2)   | O30 | Ni4 | N7  | 164.9(2)   |
| O4W              | Dy3 | O38 | 72.3(2)    | O30 | Ni4 | N8  | 87.5(2)    |
| O37              | Dy3 | O38 | 54.3(3)    | N7  | Ni4 | N8  | 105.6(3)   |
| O32 <sup>3</sup> | Dy3 | O17 | 76.53(17)  | O30 | Ni4 | O26 | 77.99(19)  |
| O22              | Dy3 | O17 | 129.48(16) | N7  | Ni4 | O26 | 90.4(2)    |
| O28              | Dy3 | O17 | 135.73(17) | N8  | Ni4 | O26 | 162.0(2)   |
| O18              | Dy3 | O17 | 63.18(15)  | O30 | Ni4 | O27 | 90.66(19)  |
| O4W              | Dy3 | O17 | 75.01(16)  | N7  | Ni4 | O27 | 82.1(2)    |
| O37              | Dy3 | O17 | 95.4(2)    | N8  | Ni4 | O27 | 89.1(2)    |
| O38              | Dy3 | O17 | 70.9(2)    | O26 | Ni4 | O27 | 101.46(19) |
| O32 <sup>3</sup> | Dy3 | O21 | 75.66(17)  | O30 | Ni4 | O31 | 97.29(19)  |
| O22              | Dy3 | O21 | 61.79(16)  | N7  | Ni4 | O31 | 91.6(2)    |
| O28              | Dy3 | O21 | 67.12(16)  | N8  | Ni4 | O31 | 84.5(2)    |
| O18              | Dy3 | O21 | 114.70(15) | O26 | Ni4 | O31 | 86.9(2)    |
| O4W              | Dy3 | O21 | 132.62(16) | O27 | Ni4 | O31 | 169.6(2)   |
| O37              | Dy3 | O21 | 72.8(2)    | Ni1 | O2  | Dy1 | 105.84(18) |

|                  |     |     |            |     |     |     |            |
|------------------|-----|-----|------------|-----|-----|-----|------------|
| O38              | Dy3 | O21 | 117.1(2)   | Ni1 | O6  | Dy1 | 108.36(19) |
| O17              | Dy3 | O21 | 152.01(15) | Ni2 | O10 | Dy2 | 104.12(19) |
| O32 <sup>3</sup> | Dy3 | N10 | 94.0(3)    | Ni2 | O14 | Dy2 | 108.0(2)   |
| O22              | Dy3 | N10 | 140.7(2)   | Ni3 | O18 | Dy3 | 105.24(18) |
| O28              | Dy3 | N10 | 64.8(2)    | Ni3 | O22 | Dy3 | 108.1(2)   |
| O18              | Dy3 | N10 | 151.4(2)   | Ni4 | O26 | Dy4 | 104.14(19) |
| O4W              | Dy3 | N10 | 99.5(3)    | Ni4 | O30 | Dy4 | 108.8(2)   |

<sup>1</sup>1-Y,-1/2+X,1/4+Z; <sup>2</sup>1/2+Y,1-X,-1/4+Z; <sup>3</sup>+Y,1/2-X,1/4+Z; <sup>4</sup>1/2-Y,+X,-1/4+Z

**Table S3** Selected bond distances (Å) for complex **2**

| Atom | Atom             | Length/Å  | Atom | Atom             | Length/Å  |
|------|------------------|-----------|------|------------------|-----------|
| Co1  | O2               | 2.029 (4) | Dy1  | O1               | 2.647 (4) |
| Co1  | O6               | 2.048 (4) | Dy1  | N9               | 2.881 (7) |
| Co1  | N1               | 2.062 (5) | Dy2  | O4               | 2.275 (4) |
| Co1  | N2               | 2.067 (5) | Dy2  | O10              | 2.288 (4) |
| Co1  | O3               | 2.109 (4) | Dy2  | O3W              | 2.345 (4) |
| Co1  | O7               | 2.117 (4) | Dy2  | O2W              | 2.347 (4) |
| Co2  | O14              | 2.036 (4) | Dy2  | O14              | 2.384 (4) |
| Co2  | O10              | 2.046 (4) | Dy2  | O8 <sup>2</sup>  | 2.411 (4) |
| Co2  | N4               | 2.070 (5) | Dy2  | O13              | 2.511 (5) |
| Co2  | N3               | 2.086 (5) | Dy2  | O9               | 2.585 (5) |
| Co2  | O15              | 2.109 (4) | Dy3  | O32 <sup>3</sup> | 2.272 (4) |
| Co2  | O11              | 2.154 (4) | Dy3  | O22              | 2.295 (4) |
| Co3  | O22              | 2.044 (4) | Dy3  | O18              | 2.348 (4) |
| Co3  | O18              | 2.052 (4) | Dy3  | O28              | 2.363 (4) |
| Co3  | N5               | 2.057 (5) | Dy3  | O4W              | 2.387 (4) |
| Co3  | N6               | 2.063 (5) | Dy3  | O41              | 2.387 (6) |
| Co3  | O19              | 2.098 (4) | Dy3  | O43              | 2.471 (6) |
| Co3  | O23              | 2.178 (4) | Dy3  | O17              | 2.576 (5) |
| Co4  | O30              | 2.042 (4) | Dy3  | O21              | 2.678 (5) |
| Co4  | O26              | 2.065 (4) | Dy3  | N10              | 2.828 (9) |
| Co4  | O27              | 2.078 (4) | Dy4  | O33              | 2.250 (4) |
| Co4  | N7               | 2.094 (5) | Dy4  | O30              | 2.285 (4) |
| Co4  | N8               | 2.102 (5) | Dy4  | O24              | 2.298 (4) |
| Co4  | O31              | 2.117 (4) | Dy4  | O5W              | 2.350 (4) |
| Dy1  | O2               | 2.301 (4) | Dy4  | O26              | 2.381 (4) |
| Dy1  | O12 <sup>1</sup> | 2.334 (4) | Dy4  | O20 <sup>4</sup> | 2.450 (4) |
| Dy1  | O6               | 2.352 (4) | Dy4  | O29              | 2.543 (4) |
| Dy1  | O16              | 2.369 (4) | Dy4  | O25              | 2.575 (4) |
| Dy1  | O35              | 2.441 (5) | O8   | Dy2 <sup>1</sup> | 2.411 (4) |
| Dy1  | O1W              | 2.453 (4) | O12  | Dy1 <sup>2</sup> | 2.334 (4) |
| Dy1  | O36              | 2.480 (5) | O20  | Dy4 <sup>3</sup> | 2.450 (4) |
| Dy1  | O5               | 2.564 (4) | O32  | Dy3 <sup>4</sup> | 2.272 (4) |

<sup>1</sup>+Y,1/2-X,1/4+Z; <sup>2</sup>1/2-Y,+X,-1/4+Z; <sup>3</sup>1-Y,-1/2+X,1/4+Z; <sup>4</sup>1/2+Y,1-X,-1/4+Z



**Table S4** Selected bond angles (°) for complex **2**

| Atom | Atom | Atom | Angle/°    | Atom             | Atom | Atom            | Angle/°    |
|------|------|------|------------|------------------|------|-----------------|------------|
| O2   | Co1  | O6   | 77.55(16)  | O10              | Dy2  | O3W             | 87.78(15)  |
| O2   | Co1  | N1   | 87.12(19)  | O4               | Dy2  | O2W             | 77.11(15)  |
| O6   | Co1  | N1   | 158.74(18) | O10              | Dy2  | O2W             | 146.68(16) |
| O2   | Co1  | N2   | 159.05(17) | O3W              | Dy2  | O2W             | 116.68(16) |
| O6   | Co1  | N2   | 89.49(17)  | O4               | Dy2  | O14             | 77.86(14)  |
| N1   | Co1  | N2   | 109.1(2)   | O10              | Dy2  | O14             | 67.10(14)  |
| O2   | Co1  | O3   | 104.61(16) | O3W              | Dy2  | O14             | 71.11(14)  |
| O6   | Co1  | O3   | 86.49(15)  | O2W              | Dy2  | O14             | 139.84(16) |
| N1   | Co1  | O3   | 83.20(17)  | O4               | Dy2  | O8 <sup>2</sup> | 140.51(15) |
| N2   | Co1  | O3   | 90.75(17)  | O10              | Dy2  | O8 <sup>2</sup> | 91.44(15)  |
| O2   | Co1  | O7   | 85.44(16)  | O3W              | Dy2  | O8 <sup>2</sup> | 74.54(15)  |
| O6   | Co1  | O7   | 102.45(15) | O2W              | Dy2  | O8 <sup>2</sup> | 75.30(15)  |
| N1   | Co1  | O7   | 90.76(18)  | O14              | Dy2  | O8 <sup>2</sup> | 139.72(14) |
| N2   | Co1  | O7   | 81.33(17)  | O4               | Dy2  | O13             | 80.92(15)  |
| O3   | Co1  | O7   | 167.93(17) | O10              | Dy2  | O13             | 131.17(15) |
| O14  | Co2  | O10  | 78.53(16)  | O3W              | Dy2  | O13             | 69.98(16)  |
| O14  | Co2  | N4   | 88.5(2)    | O2W              | Dy2  | O13             | 80.69(16)  |
| O10  | Co2  | N4   | 163.4(2)   | O14              | Dy2  | O13             | 64.69(15)  |
| O14  | Co2  | N3   | 159.53(17) | O8 <sup>2</sup>  | Dy2  | O13             | 121.15(15) |
| O10  | Co2  | N3   | 86.56(19)  | O4               | Dy2  | O9              | 76.80(15)  |
| N4   | Co2  | N3   | 108.4(2)   | O10              | Dy2  | O9              | 63.38(14)  |
| O14  | Co2  | O15  | 106.60(17) | O3W              | Dy2  | O9              | 134.85(15) |
| O10  | Co2  | O15  | 92.11(16)  | O2W              | Dy2  | O9              | 83.40(16)  |
| N4   | Co2  | O15  | 81.52(19)  | O14              | Dy2  | O9              | 120.34(14) |
| N3   | Co2  | O15  | 87.73(18)  | O8 <sup>2</sup>  | Dy2  | O9              | 72.46(14)  |
| O14  | Co2  | O11  | 86.89(16)  | O13              | Dy2  | O9              | 155.00(15) |
| O10  | Co2  | O11  | 99.47(16)  | O32 <sup>3</sup> | Dy3  | O22             | 102.16(16) |
| N4   | Co2  | O11  | 90.12(19)  | O32 <sup>3</sup> | Dy3  | O18             | 79.34(16)  |
| N3   | Co2  | O11  | 81.76(18)  | O22              | Dy3  | O18             | 67.59(14)  |
| O15  | Co2  | O11  | 163.81(17) | O32 <sup>3</sup> | Dy3  | O28             | 137.62(16) |
| O22  | Co3  | O18  | 78.22(16)  | O22              | Dy3  | O28             | 77.37(15)  |
| O22  | Co3  | N5   | 159.71(17) | O18              | Dy3  | O28             | 134.58(14) |
| O18  | Co3  | N5   | 89.21(19)  | O32 <sup>3</sup> | Dy3  | O4W             | 145.83(16) |
| O22  | Co3  | N6   | 87.0(2)    | O22              | Dy3  | O4W             | 83.52(15)  |
| O18  | Co3  | N6   | 157.68(19) | O18              | Dy3  | O4W             | 71.74(14)  |
| N5   | Co3  | N6   | 109.2(2)   | O28              | Dy3  | O4W             | 76.55(14)  |
| O22  | Co3  | O19  | 84.99(16)  | O32 <sup>3</sup> | Dy3  | O41             | 72.8(2)    |
| O18  | Co3  | O19  | 102.59(17) | O22              | Dy3  | O41             | 133.67(19) |
| N5   | Co3  | O19  | 82.27(17)  | O18              | Dy3  | O41             | 147.82(17) |
| N6   | Co3  | O19  | 92.55(19)  | O28              | Dy3  | O41             | 77.60(18)  |

|                  |     |                  |            |                  |     |                  |            |
|------------------|-----|------------------|------------|------------------|-----|------------------|------------|
| O22              | Co3 | O23              | 101.84(16) | O4W              | Dy3 | O41              | 126.8(2)   |
| O18              | Co3 | O23              | 85.68(16)  | O32 <sup>3</sup> | Dy3 | O43              | 112.6(2)   |
| N5               | Co3 | O23              | 92.90(17)  | O22              | Dy3 | O43              | 143.39(18) |
| N6               | Co3 | O23              | 81.06(18)  | O18              | Dy3 | O43              | 128.7(2)   |
| O19              | Co3 | O23              | 170.31(18) | O28              | Dy3 | O43              | 69.43(18)  |
| O30              | Co4 | O26              | 77.83(17)  | O4W              | Dy3 | O43              | 74.3(2)    |
| O30              | Co4 | O27              | 91.72(16)  | O41              | Dy3 | O43              | 53.1(2)    |
| O26              | Co4 | O27              | 106.74(17) | O32 <sup>3</sup> | Dy3 | O17              | 76.40(16)  |
| O30              | Co4 | N7               | 162.9(2)   | O22              | Dy3 | O17              | 129.81(15) |
| O26              | Co4 | N7               | 89.3(2)    | O18              | Dy3 | O17              | 62.83(15)  |
| O27              | Co4 | N7               | 81.13(18)  | O28              | Dy3 | O17              | 136.35(15) |
| O30              | Co4 | N8               | 86.6(2)    | O4W              | Dy3 | O17              | 74.44(14)  |
| O26              | Co4 | N8               | 159.32(18) | O41              | Dy3 | O17              | 94.61(19)  |
| O27              | Co4 | N8               | 87.06(18)  | O43              | Dy3 | O17              | 71.76(19)  |
| N7               | Co4 | N8               | 108.4(2)   | O32 <sup>3</sup> | Dy3 | O21              | 76.36(16)  |
| O30              | Co4 | O31              | 101.54(16) | O22              | Dy3 | O21              | 61.12(14)  |
| O26              | Co4 | O31              | 87.14(16)  | O18              | Dy3 | O21              | 115.68(14) |
| O27              | Co4 | O31              | 162.66(17) | O28              | Dy3 | O21              | 66.36(14)  |
| N7               | Co4 | O31              | 88.87(18)  | O4W              | Dy3 | O21              | 132.72(14) |
| N8               | Co4 | O31              | 82.67(18)  | O41              | Dy3 | O21              | 73.24(19)  |
| O2               | Dy1 | O12 <sup>1</sup> | 103.73(15) | O43              | Dy3 | O21              | 115.6(2)   |
| O2               | Dy1 | O6               | 66.57(13)  | O17              | Dy3 | O21              | 152.42(13) |
| O12 <sup>1</sup> | Dy1 | O6               | 81.78(14)  | O32 <sup>3</sup> | Dy3 | N10              | 95.2(2)    |
| O2               | Dy1 | O16              | 76.28(15)  | O22              | Dy3 | N10              | 141.1(2)   |
| O12 <sup>1</sup> | Dy1 | O16              | 140.27(15) | O18              | Dy3 | N10              | 150.8(2)   |
| O6               | Dy1 | O16              | 130.40(14) | O28              | Dy3 | N10              | 66.5(2)    |
| O2               | Dy1 | O35              | 130.12(18) | O4W              | Dy3 | N10              | 101.2(3)   |
| O12 <sup>1</sup> | Dy1 | O35              | 74.53(17)  | O41              | Dy3 | N10              | 25.6(2)    |
| O6               | Dy1 | O35              | 153.62(16) | O43              | Dy3 | N10              | 28.5(2)    |
| O16              | Dy1 | O35              | 75.98(17)  | O17              | Dy3 | N10              | 87.9(2)    |
| O2               | Dy1 | O1W              | 86.47(14)  | O21              | Dy3 | N10              | 90.3(2)    |
| O12 <sup>1</sup> | Dy1 | O1W              | 145.33(15) | O33              | Dy4 | O30              | 150.33(16) |
| O6               | Dy1 | O1W              | 71.97(13)  | O33              | Dy4 | O24              | 88.14(16)  |
| O16              | Dy1 | O1W              | 74.14(14)  | O30              | Dy4 | O24              | 95.94(15)  |
| O35              | Dy1 | O1W              | 123.66(16) | O33              | Dy4 | O5W              | 102.15(16) |
| O2               | Dy1 | O36              | 145.49(17) | O30              | Dy4 | O5W              | 91.30(15)  |
| O12 <sup>1</sup> | Dy1 | O36              | 108.22(17) | O24              | Dy4 | O5W              | 144.87(15) |
| O6               | Dy1 | O36              | 130.37(17) | O33              | Dy4 | O26              | 142.15(17) |
| O16              | Dy1 | O36              | 70.92(18)  | O30              | Dy4 | O26              | 67.11(14)  |
| O35              | Dy1 | O36              | 50.66(18)  | O24              | Dy4 | O26              | 78.90(14)  |
| O1W              | Dy1 | O36              | 74.67(16)  | O5W              | Dy4 | O26              | 72.44(14)  |
| O2               | Dy1 | O5               | 129.72(14) | O33              | Dy4 | O20 <sup>4</sup> | 74.77(16)  |

|                  |     |     |            |                  |     |                  |            |
|------------------|-----|-----|------------|------------------|-----|------------------|------------|
| O12 <sup>1</sup> | Dy1 | O5  | 74.92(15)  | O30              | Dy4 | O20 <sup>4</sup> | 84.23(15)  |
| O6               | Dy1 | O5  | 63.50(13)  | O24              | Dy4 | O20 <sup>4</sup> | 141.63(14) |
| O16              | Dy1 | O5  | 135.89(15) | O5W              | Dy4 | O20 <sup>4</sup> | 73.24(14)  |
| O35              | Dy1 | O5  | 98.63(18)  | O26              | Dy4 | O20 <sup>4</sup> | 134.09(14) |
| O1W              | Dy1 | O5  | 73.27(14)  | O33              | Dy4 | O29              | 88.72(17)  |
| O36              | Dy1 | O5  | 72.38(17)  | O30              | Dy4 | O29              | 63.63(15)  |
| O2               | Dy1 | O1  | 61.82(14)  | O24              | Dy4 | O29              | 78.20(15)  |
| O12 <sup>1</sup> | Dy1 | O1  | 75.94(15)  | O5W              | Dy4 | O29              | 134.73(15) |
| O6               | Dy1 | O1  | 115.62(14) | O26              | Dy4 | O29              | 122.30(14) |
| O16              | Dy1 | O1  | 69.23(14)  | O20 <sup>4</sup> | Dy4 | O29              | 67.53(14)  |
| O35              | Dy1 | O1  | 69.84(18)  | O33              | Dy4 | O25              | 79.14(16)  |
| O1W              | Dy1 | O1  | 135.86(14) | O30              | Dy4 | O25              | 130.49(14) |
| O36              | Dy1 | O1  | 113.95(17) | O24              | Dy4 | O25              | 78.36(15)  |
| O5               | Dy1 | O1  | 150.63(13) | O5W              | Dy4 | O25              | 70.96(15)  |
| O2               | Dy1 | N9  | 141.54(18) | O26              | Dy4 | O25              | 63.52(14)  |
| O12 <sup>1</sup> | Dy1 | N9  | 93.31(16)  | O20 <sup>4</sup> | Dy4 | O25              | 129.40(14) |
| O6               | Dy1 | N9  | 151.17(18) | O29              | Dy4 | O25              | 153.88(14) |
| O16              | Dy1 | N9  | 68.86(17)  | Co1              | O2  | Dy1              | 108.30(17) |
| O35              | Dy1 | N9  | 25.13(18)  | Co1              | O6  | Dy1              | 105.75(16) |
| O1W              | Dy1 | N9  | 98.85(17)  | Co2              | O10 | Dy2              | 107.75(18) |
| O36              | Dy1 | N9  | 25.82(18)  | Co2              | O14 | Dy2              | 104.58(18) |
| O5               | Dy1 | N9  | 87.75(19)  | Co3              | O18 | Dy3              | 105.52(16) |
| O1               | Dy1 | N9  | 90.27(19)  | Co3              | O22 | Dy3              | 107.74(17) |
| O4               | Dy2 | O10 | 96.46(15)  | Co4              | O26 | Dy4              | 103.79(17) |
| O4               | Dy2 | O3W | 144.16(15) | Co4              | O30 | Dy4              | 108.00(18) |

<sup>1</sup>+Y,1/2-X,1/4+Z; <sup>2</sup>1/2-Y,+X,-1/4+Z; <sup>3</sup>1-Y,-1/2+X,1/4+Z; <sup>4</sup>1/2+Y,1-X,-1/4+Z

## 2. Coordination modes in complex 1

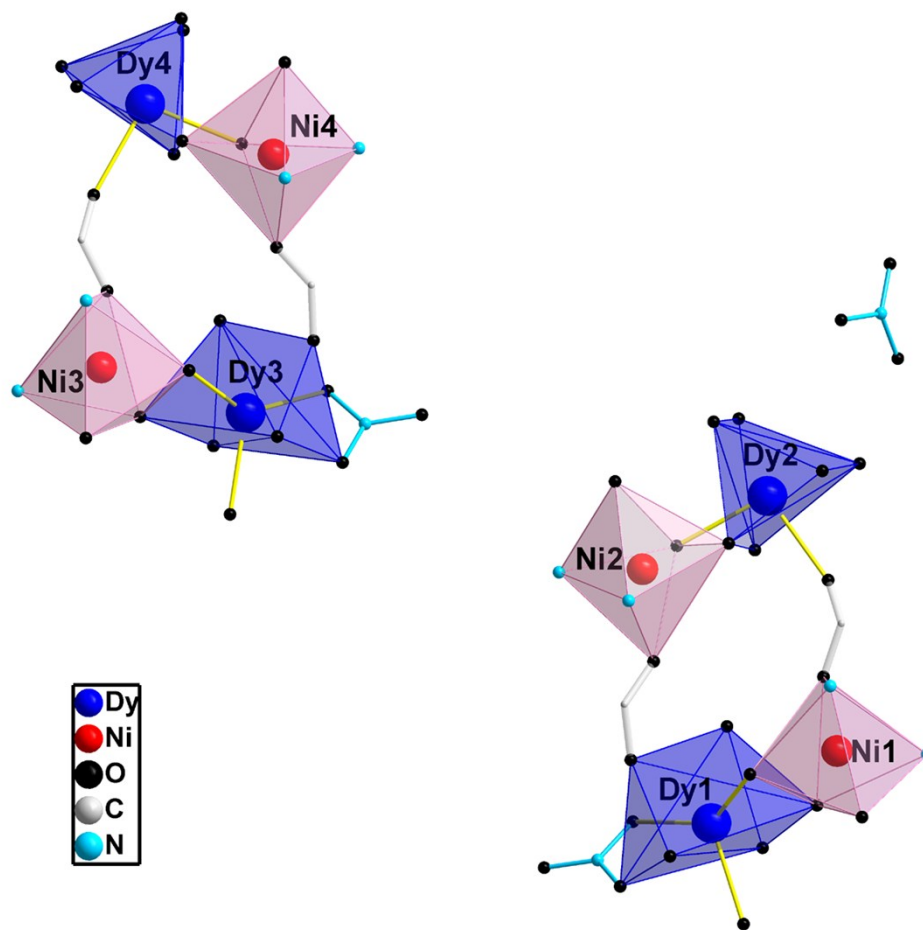

Fig. S1 Coordination polyhedra observed in complex 1.

### 3. TG-DSC curves for complexes 1 and 2

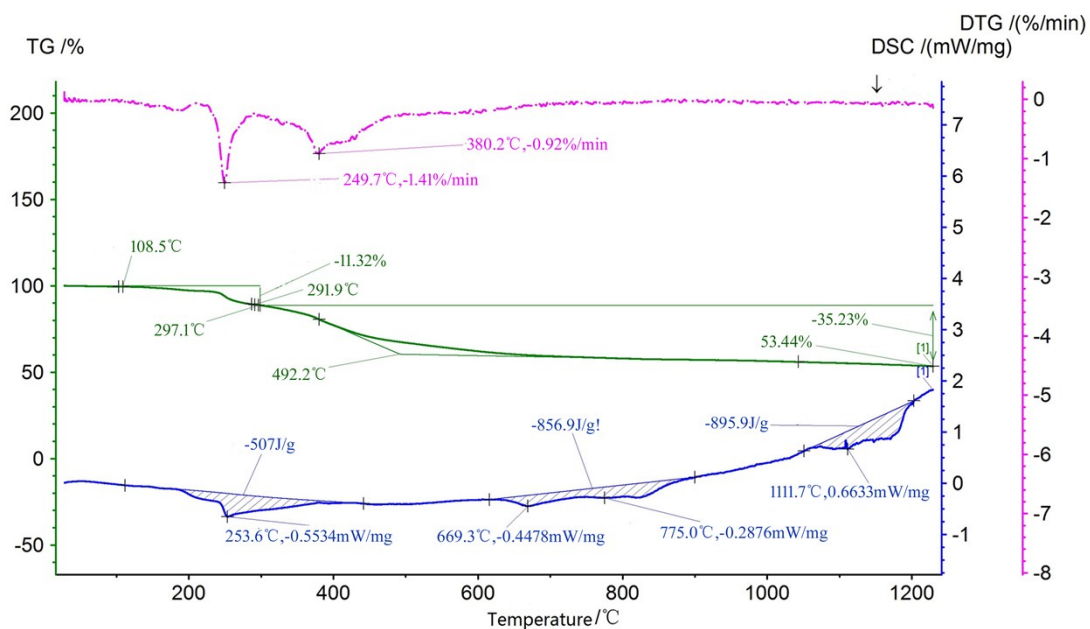

Fig. S2 The TG-DSC curves of complex 1.

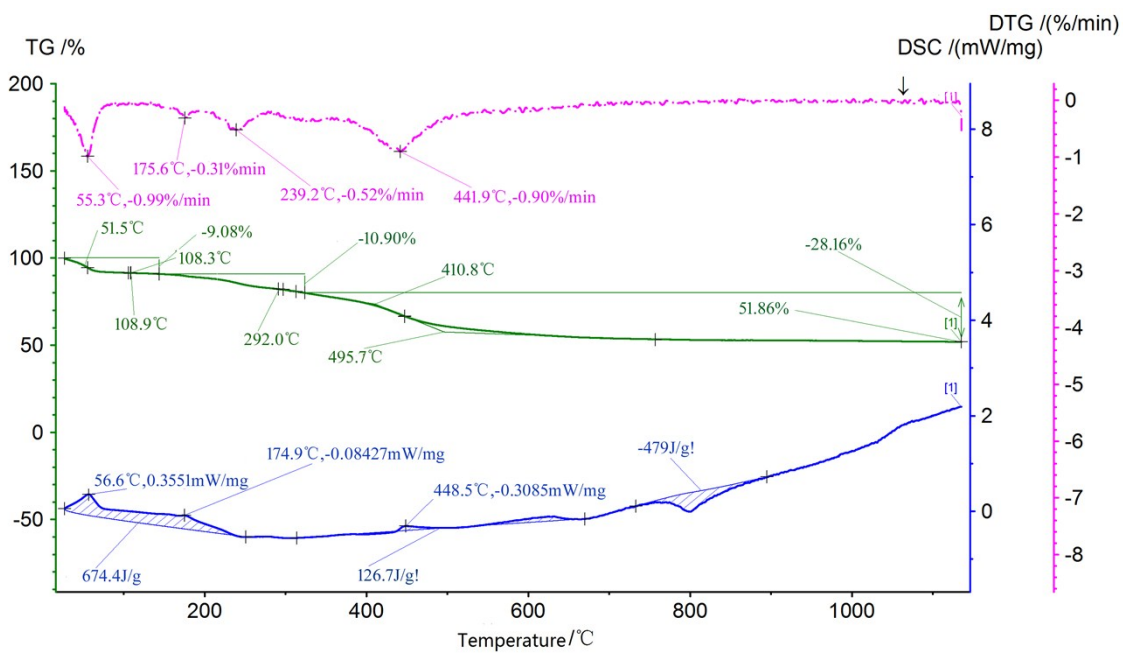

Fig. S3 The TG-DSC curves of complex 2.

#### 4. Magnetic properties for complexes 1 and 2

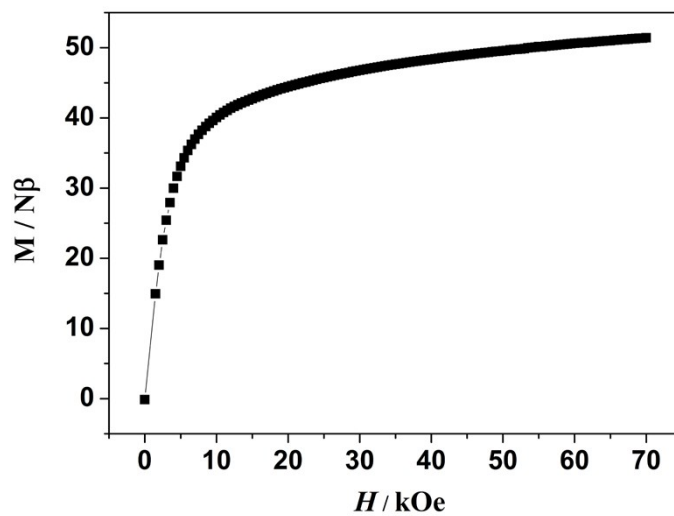

Fig. S4  $M$ - $H$  plot of **1** at 2 K.

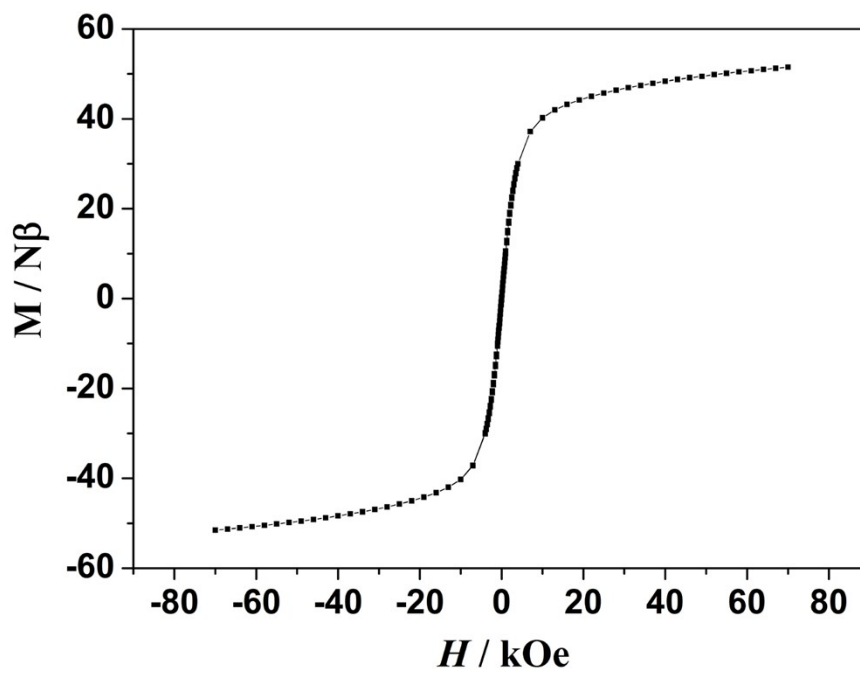

Fig. S5 The hysteresis loop of **1** at 1.8 K.

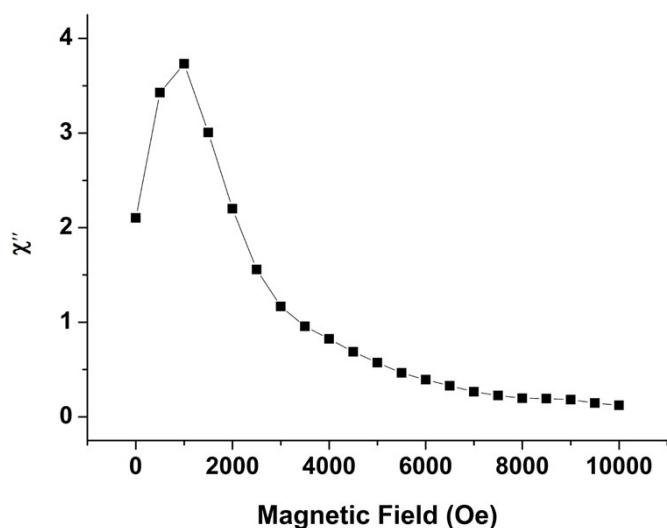

**Fig. S6** Field dependence of the out-of-phase ( $\chi''$ ) ac susceptibility for **1** with  $f = 999$  Hz.

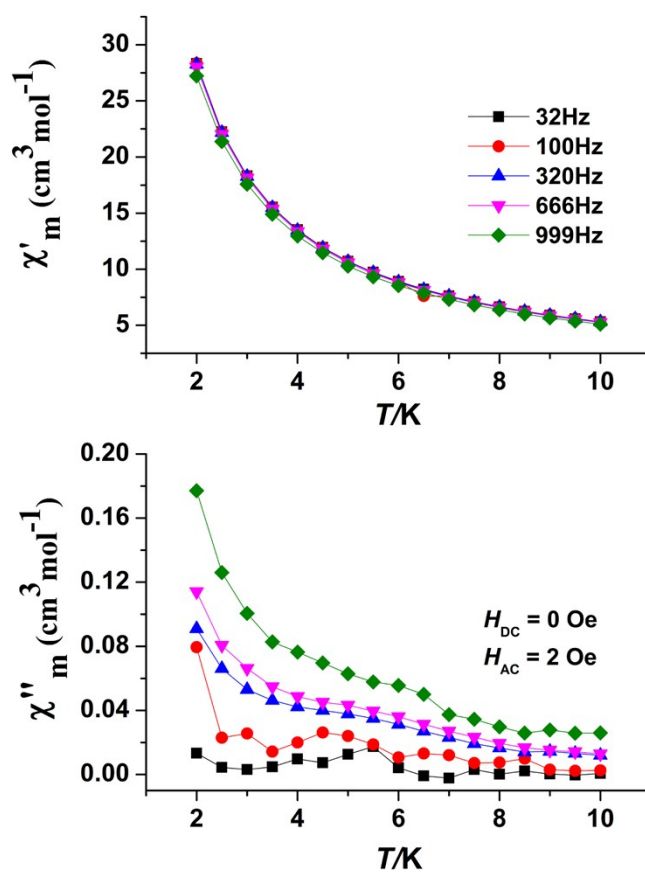

**Fig. S7** Temperature dependence of the in-phase  $\chi'_m$  and out-of-phase  $\chi''_m$  at different frequencies and a 0 Oe dc field for **2**.

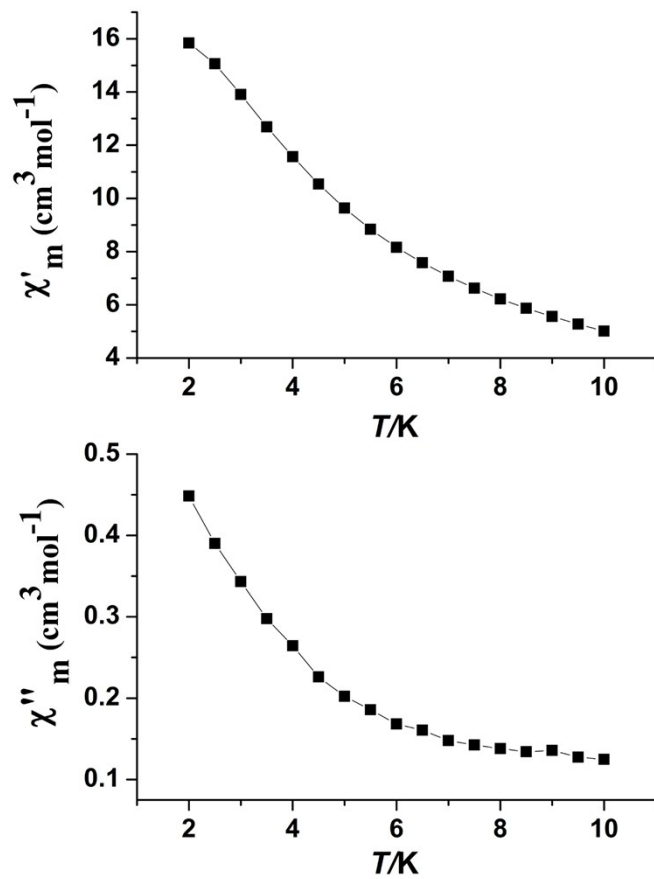

**Fig. S8** Temperature dependence of the in-phase (top) and out-of-phase (bottom) ac susceptibility for **2** under 2000 Oe dc field at 999 Hz.



## 5. XRD patterns of 1 and 2

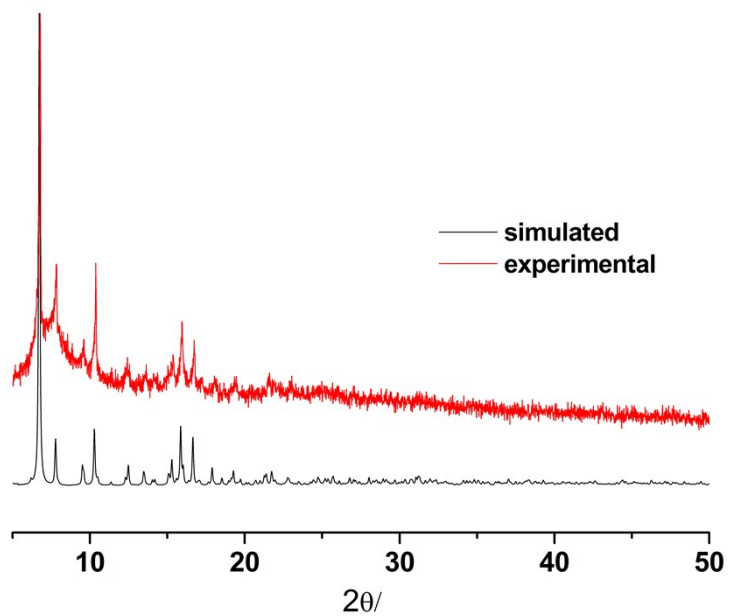

**Fig. S9** The simulated and experimental PXRD pattern of complex 1.

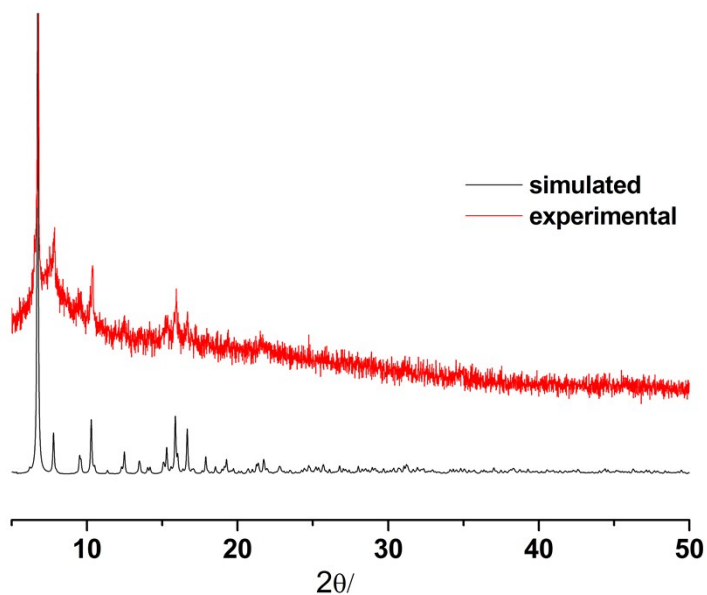

**Fig. S10** The simulated and experimental PXRD pattern of complex 2.

## 6. IR spectra of 1 and 2

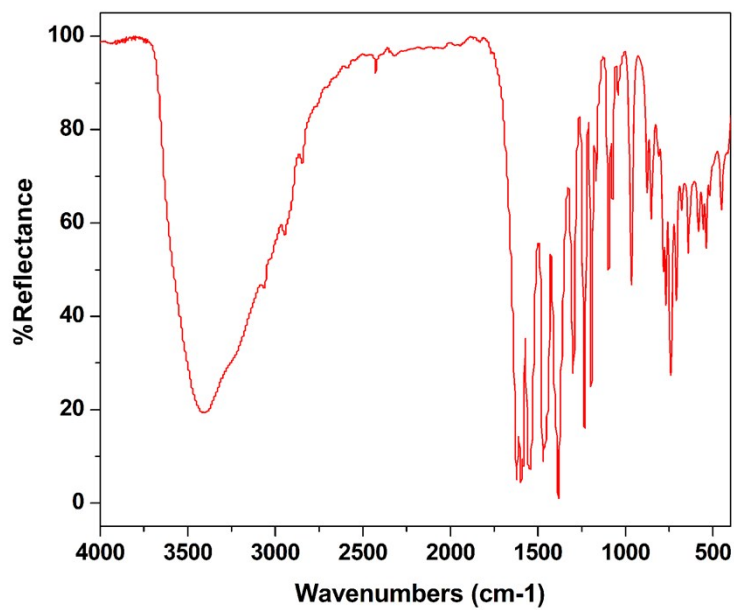

**Fig. S11** The IR spectrum of complex 1.

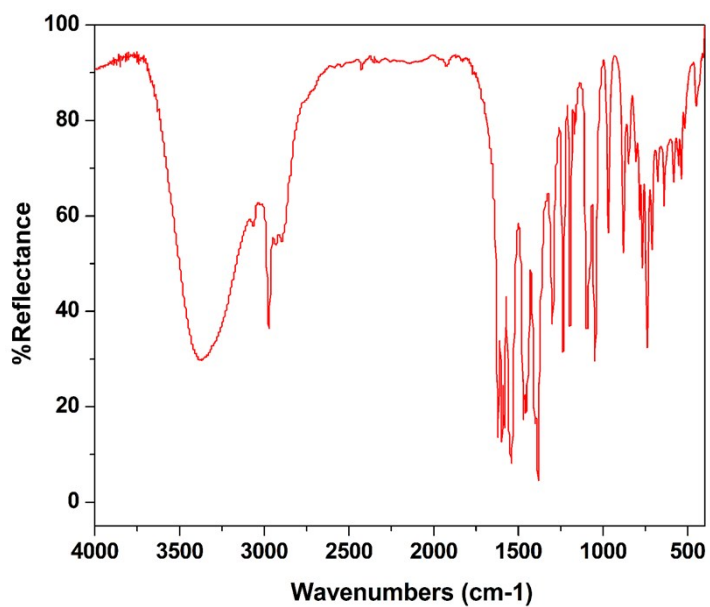

**Fig. S12** The IR spectrum of complex 2.
